# Supplementary figures and images for: Consequences of the depletion of zygotic and embryonic enhancer of zeste 2 during preimplantation mouse development
Source: Oxford University Press journal article supplement (doi:10.1242/dev.00625), 2003-08-06

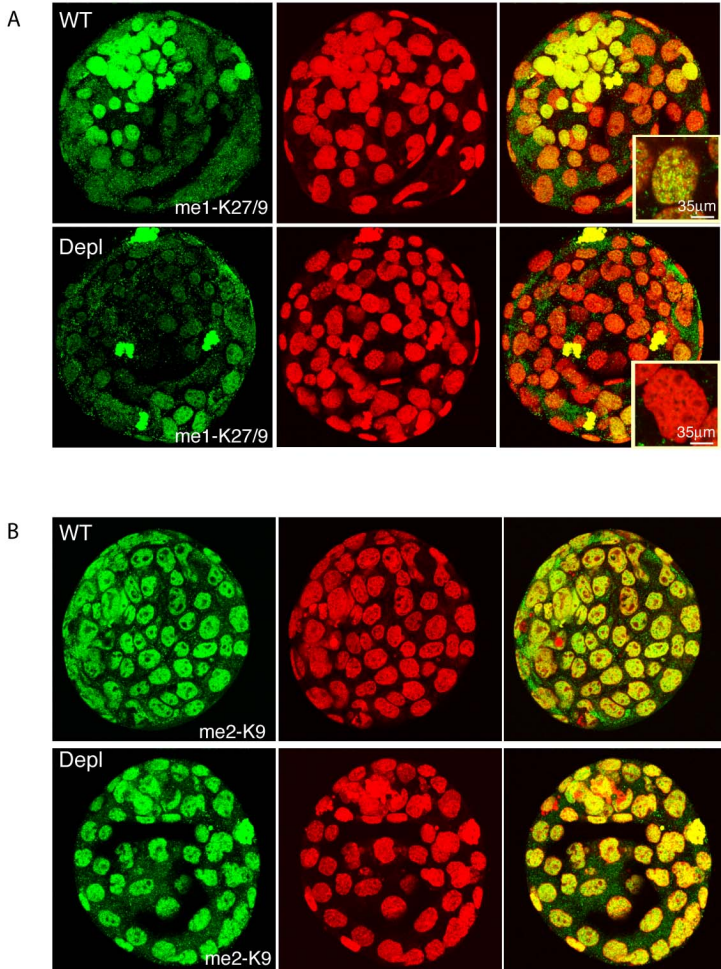

Supplementary Figure 1

Supplement: dev00625-sup-f1.pdf [file dev00625-sup-f1.pdf]
